# Supplementary material
Source: HighWire-hosted journal article supplement (https://bmjopen.bmj.com/content/10/1/e031951)
Supplement: inline-supplementary-material-1 [file inline-supplementary-material-1.pdf]

**Search strategy of Pubmed:**

| Search strategy |                                      |
|-----------------|--------------------------------------|
| Step            | Search Terms                         |
| 1               | Systematic Review [Publication Type] |
| 2               | Meta-Analysis [Publication Type]     |
| 3               | systematic review[Title/Abstract]    |
| 4               | meta-analysis[Title/Abstract]        |
| 5               | meta analysis[Title/Abstract]        |
| 6               | meta-analyses[Title/Abstract]        |
| 7               | meta analyses[Title/Abstract])       |
| 8               | OR/1-7                               |
| 9               | Helicobacter pylori[Mesh]            |
| 10              | Helicobacter pylori[Title/Abstract]  |
| 11              | Campylobacter pylori[Title/Abstract] |
| 12              | pylorus spirillum[Title/Abstract]    |
| 13              | HP[Title/Abstract]                   |
| 14              | OR/9-13                              |
| 15              | 8 AND 14                             |

Search strategy conduct on Pubmed (<https://www.ncbi.nlm.nih.gov/pubmed>).The search was last updated 1 February 2019.

The search formula of Pubmed as follow:

```
((((((((("Systematic Review" [Publication Type]) OR "Meta-Analysis" [Publication Type]) OR
systematic review[Title/Abstract]) OR meta-analysis[Title/Abstract]) OR meta
analysis[Title/Abstract]) OR meta-analyses[Title/Abstract]) OR meta analysyes[Title/Abstract]))
AND (((("Helicobacter pylori"[Mesh]) OR Helicobacter pylori[Title/Abstract]) OR Campylobacter
pylori[Title/Abstract]) OR pylorus spirillum[Title/Abstract]) OR HP[Title/Abstract]) Sort by: Best
Match Filters: Publication date to 2019/02/01
```
